# Supplementary material for: Predictors of incident diabetes in two populations: framingham heart study and hispanic community health study / study of latinos
Source: Springer Nature journal article supplement (doi:10.1186/s12889-022-13463-8), 2022-05-26
Supplement: MOESM1 [file 23085000]

**Supplemental Figure 1. Flow diagram of participant inclusion and exclusion**

**Hispanic Community Health Study/Study of Latinos cohort (HCHS/SOL)**

|        |                               |   |       |                                                      |
|--------|-------------------------------|---|-------|------------------------------------------------------|
| 16,415 | Enrolled in the study         | → | 4,792 | Excluded, no second examination                      |
| 11,623 | Completed second examination  | → | 2,546 | Excluded, prevalent or missing diabetes status       |
| 9,077  | At risk for incident diabetes | → | 428   | Excluded, prevalent coronary heart disease or stroke |
| 8,649  | Free of vascular disease      | → | 1,758 | Excluded, participants not adherent to accelerometry |
| 6,891  | Completed accelerometry       |   |       |                                                      |
| 6,891  | Final HCHS/SOL sample         |   |       |                                                      |
| 42%    | Percent of cohort included    |   |       |                                                      |

**Framingham Heart Study Gen 2, Gen 3, Omni 1 and Omni 2 cohorts**

|        |                                              |   |       |                                                      |
|--------|----------------------------------------------|---|-------|------------------------------------------------------|
| 10,239 | Enrolled in the study                        | → | 5,530 | Excluded, participants not adherent to accelerometry |
| 4,709  | Completed accelerometry                      | → | 414   | Excluded, prevalent or missing diabetes status       |
| 4,295  | At risk for incident diabetes                | → | 196   | Excluded, prevalent coronary heart disease or stroke |
| 4,099  | Free of vascular disease                     | → | 33    | Excluded, missing data on pre-diabetes               |
| 4,066  | Data available to assess pre-diabetes status |   |       |                                                      |
| 4,066  | Final FHS sample                             |   |       |                                                      |
| 40%    | Percent of cohort included                   |   |       |                                                      |
